# Supplementary material for: Global Assessment of Extinction Risk to Populations of Sockeye Salmon Oncorhynchus nerka
Source: PLoS One. 2012 Apr 12;7(4):e34065. doi: 10.1371/journal.pone.0034065 (PMC3325247; doi:10.1371/journal.pone.0034065)
Supplement: Table S3 — Sockeye salmon population status based on IUCN Red List criteria. (XLS) [file pone.0034065.s003.xls]

## Sheet: Table S3
Table S3. Sockeye salmon population status based on IUCN Red List Criteria A, B and D. ID = Identification number, CR = Critically Endangered, EN = Endangered, VU = Vulnerable, LC = Least Concern, NT = Near Threatened.
Population	Population ID	Sites assessed	% changea	Overall status	A status	B status	D status
WKamCur	4	1	-7	LC	LC A2	LC B2ab(v)	LC D1
KamRiver	7	1	-65	EN	EN A2	LC B2ab(v)	LC D1
BeringAKmix	13	1	125	LC	LC A2	LC B2ab(v)	LC D1
YukonInf	18	3	27	LC	LC A2	LC B2ab(v)	LC D1
SEBering	20	38	16	LC	LC A2	LC B2ab(v)	LC D1
Kuskokwim	21	1	-21	LC	LC A2	LC B2ab(v)	LC D1
WGulfAlaska	22	6	53	LC	LC A2	LC B2ab(v)	LC D1
Kodiak	23	12	9	LC	LC A2	LC B2ab(v)	LC D1
Cook	24	8	20	LC	LC A2	LC B2ab(v)	LC D1
PWS	25	2	81	LC	LC A2	LC B2ab(v)	LC D1
Copper	26	2	26	LC	LC A2	LC B2ab(v)	LC D1
EGulfAlaska	27	6	-39	VU	VU A2	LC B2ab(v)	LC D1
Alsek	28	2	28	LC	LC A2	LC B2ab(v)	LC D1
TF_North	29	8	9	LC	LC A2	LC B2ab(v)	LC D1
Stikine_Lower	35	6	18	LC	LC A2	LC B2ab(v)	LC D1
Outer_WHGwaii	36	2	30	LC	LC A2	LC B2ab(v)	LC D1
NassSkeena_North	37	1	-49	VU	VU A2	LC B2ab(v)	LC D1
NassSkeena_Hugh	38	1	-41	EN	VU A2	EN B2ab(v)	LC D1
NassSkeena_NHGwaii	39	3	-10	LC	LC A2	LC B2ab(v)	LC D1
Nass_Upper	40	3	-38	VU	VU A2	VU B2ab(v)	LC D1
Nass_Gingit	41	1	89	LC	LC A2	LC B2ab(v)	LC D1
Nass_Coastal	42	2	100	LC	LC A2	LC B2ab(v)	LC D1
Skeena_Alastair	43	2	-39	EN	VU A2	EN B2ab(v)	LC D1
Skeena_Schul	44	1	-94	CR	CR A2	EN B2ab(v)	LC D1
Skeena_Kitsmklm	45	1	42	LC	LC A2	LC B2ab(v)	LC D1
Skeena_Kispiox	47	1	93	LC	LC A2	LC B2ab(v)	LC D1
Skeena_Babine	48	14	91	LC	LC A2	LC B2ab(v)	LC D1
Skeena_Nan	49	1	-84	CR	CR A2	EN B2ab(v)	LC D1
Skeena_Upper	50	2	-55	EN	EN A2	EN B2ab(v)	LC D1
Hecate_EHGwaii	51	1	162	LC	LC A2	LC B2ab(v)	LC D1
Hecate_Strait	52	8	33	LC	LC A2	LC B2ab(v)	LC D1
Hecate_Lowe	53	1	-29	LC	LC A2	LC B2ab(v)	LC D1
Hecate_Kitl	54	6	7	LC	LC A2	LC B2ab(v)	LC D1
Hecate_QCS	55	22	-54	EN	EN A2	LC B2ab(v)	LC D1
Hecate_Atn	57	1	-27	LC	LC A2	LC B2ab(v)	LC D1
PgtGeorgia_Quatse	59	1	702	LC	LC A2	LC B2ab(v)	LC D1
PgtGeorgia_Nimpk	60	1	-2	LC	LC A2	LC B2ab(v)	LC D1
PgtGeorgia_Sakinaw	65	2	-92	CR	CR A2	VU B2ab(v)	LC D1
PgtGeorgia_Baker	66	1	59	LC	LC A2	LC B2ab(v)	LC D1
Fraser_Pitt	68	1	420	LC	LC A2	LC B2ab(v)	LC D1
Fraser_CultusL	70	1	-66	EN	EN A2	EN B2ab(v)	LC D1
Fraser_Harrison	71	1	998	LC	LC A2	LC B2ab(v)	LC D1
Fraser_WeaverL	72	1	-22	LC	LC A2	LC B2ab(v)	LC D1
Fraser_BigSilver	73	1	1513	LC	LC A2	LC B2ab(v)	LC D1
Fraser_Birkenhead	74	1	7	LC	LC A2	LC B2ab(v)	LC D1
Fraser_ShuswpES	75	8	0	LC	LC A2	LC B2ab(v)	LC D1
Fraser_ShuswpL	76	16	263	LC	LC A2	LC B2ab(v)	LC D1
Fraser_KamlpsES	77	5	117	LC	LC A2	LC B2ab(v)	LC D1
Fraser_Gat	78	1	-67	EN	EN A2	EN B2ab(v)	LC D1
Fraser_NahatES	79	2	-62	EN	EN A2	EN B2ab(v)	LC D1
Fraser_ChilkoS	82	1	-38	EN	VU A2	EN B2ab(v)	LC D1
Fraser_QuesnelS	83	13	-16	LC	LC A2	LC B2ab(v)	LC D1
Fraser_NadinaES	84	1	50	LC	LC A2	LC B2ab(v)	LC D1
Fraser_NechakoS	85	1	12	LC	LC A2	LC B2ab(v)	LC D1
Fraser_EStuart	86	35	-77	EN	EN A2	VU B2ab(v)	LC D1
Fraser_StuartS	87	6	-78	EN	EN A2	VU B2ab(v)	LC D1
Fraser_BowronES	88	1	-69	EN	EN A2	EN B2ab(v)	LC D1
VancIslCoast	89	2	43	LC	LC A2	LC B2ab(v)	LC D1
SeasUpwell	90	2	142	LC	LC A2	LC B2ab(v)	LC D1
Columbia_Wen	91	1	121	NT	LC A2	NT B2ab(iii)	LC D1
Columbia_Okan	92	1	291	NT	LC A2	NT B2ab(iii)	LC D1
Columbia_Red	93	1	-68	CR	EN A2	EN B2ab(v)	CR D
a Value reflects the 50th percentile (median) of the decline-rate distribution for monitored spawning sites within a population, reflecting changes in abundance over 3 generations or 12 years.
